## CORRECTION

# Integrin $\alpha_v\beta_3$ and thyroid hormones promote expansion of progenitors in embryonic neocortex

**Denise Stenzel, Michaela Wilsch-Bräuninger, Fong Kuan Wong, Heike Heuer and Wieland B. Huttner**

There was an error published in *Development* **141**, 795-806.

In the version of Fig. S1 originally published, panels H-L were missing. The correct Fig. S1 now appears in the supplementary data.

We apologise to the authors and readers for this mistake.
